# Supplementary material
Source: ML conference proceedings conference paper supplement (https://aclanthology.org/2024.findings-emnlp.405)

Model: GPT-4

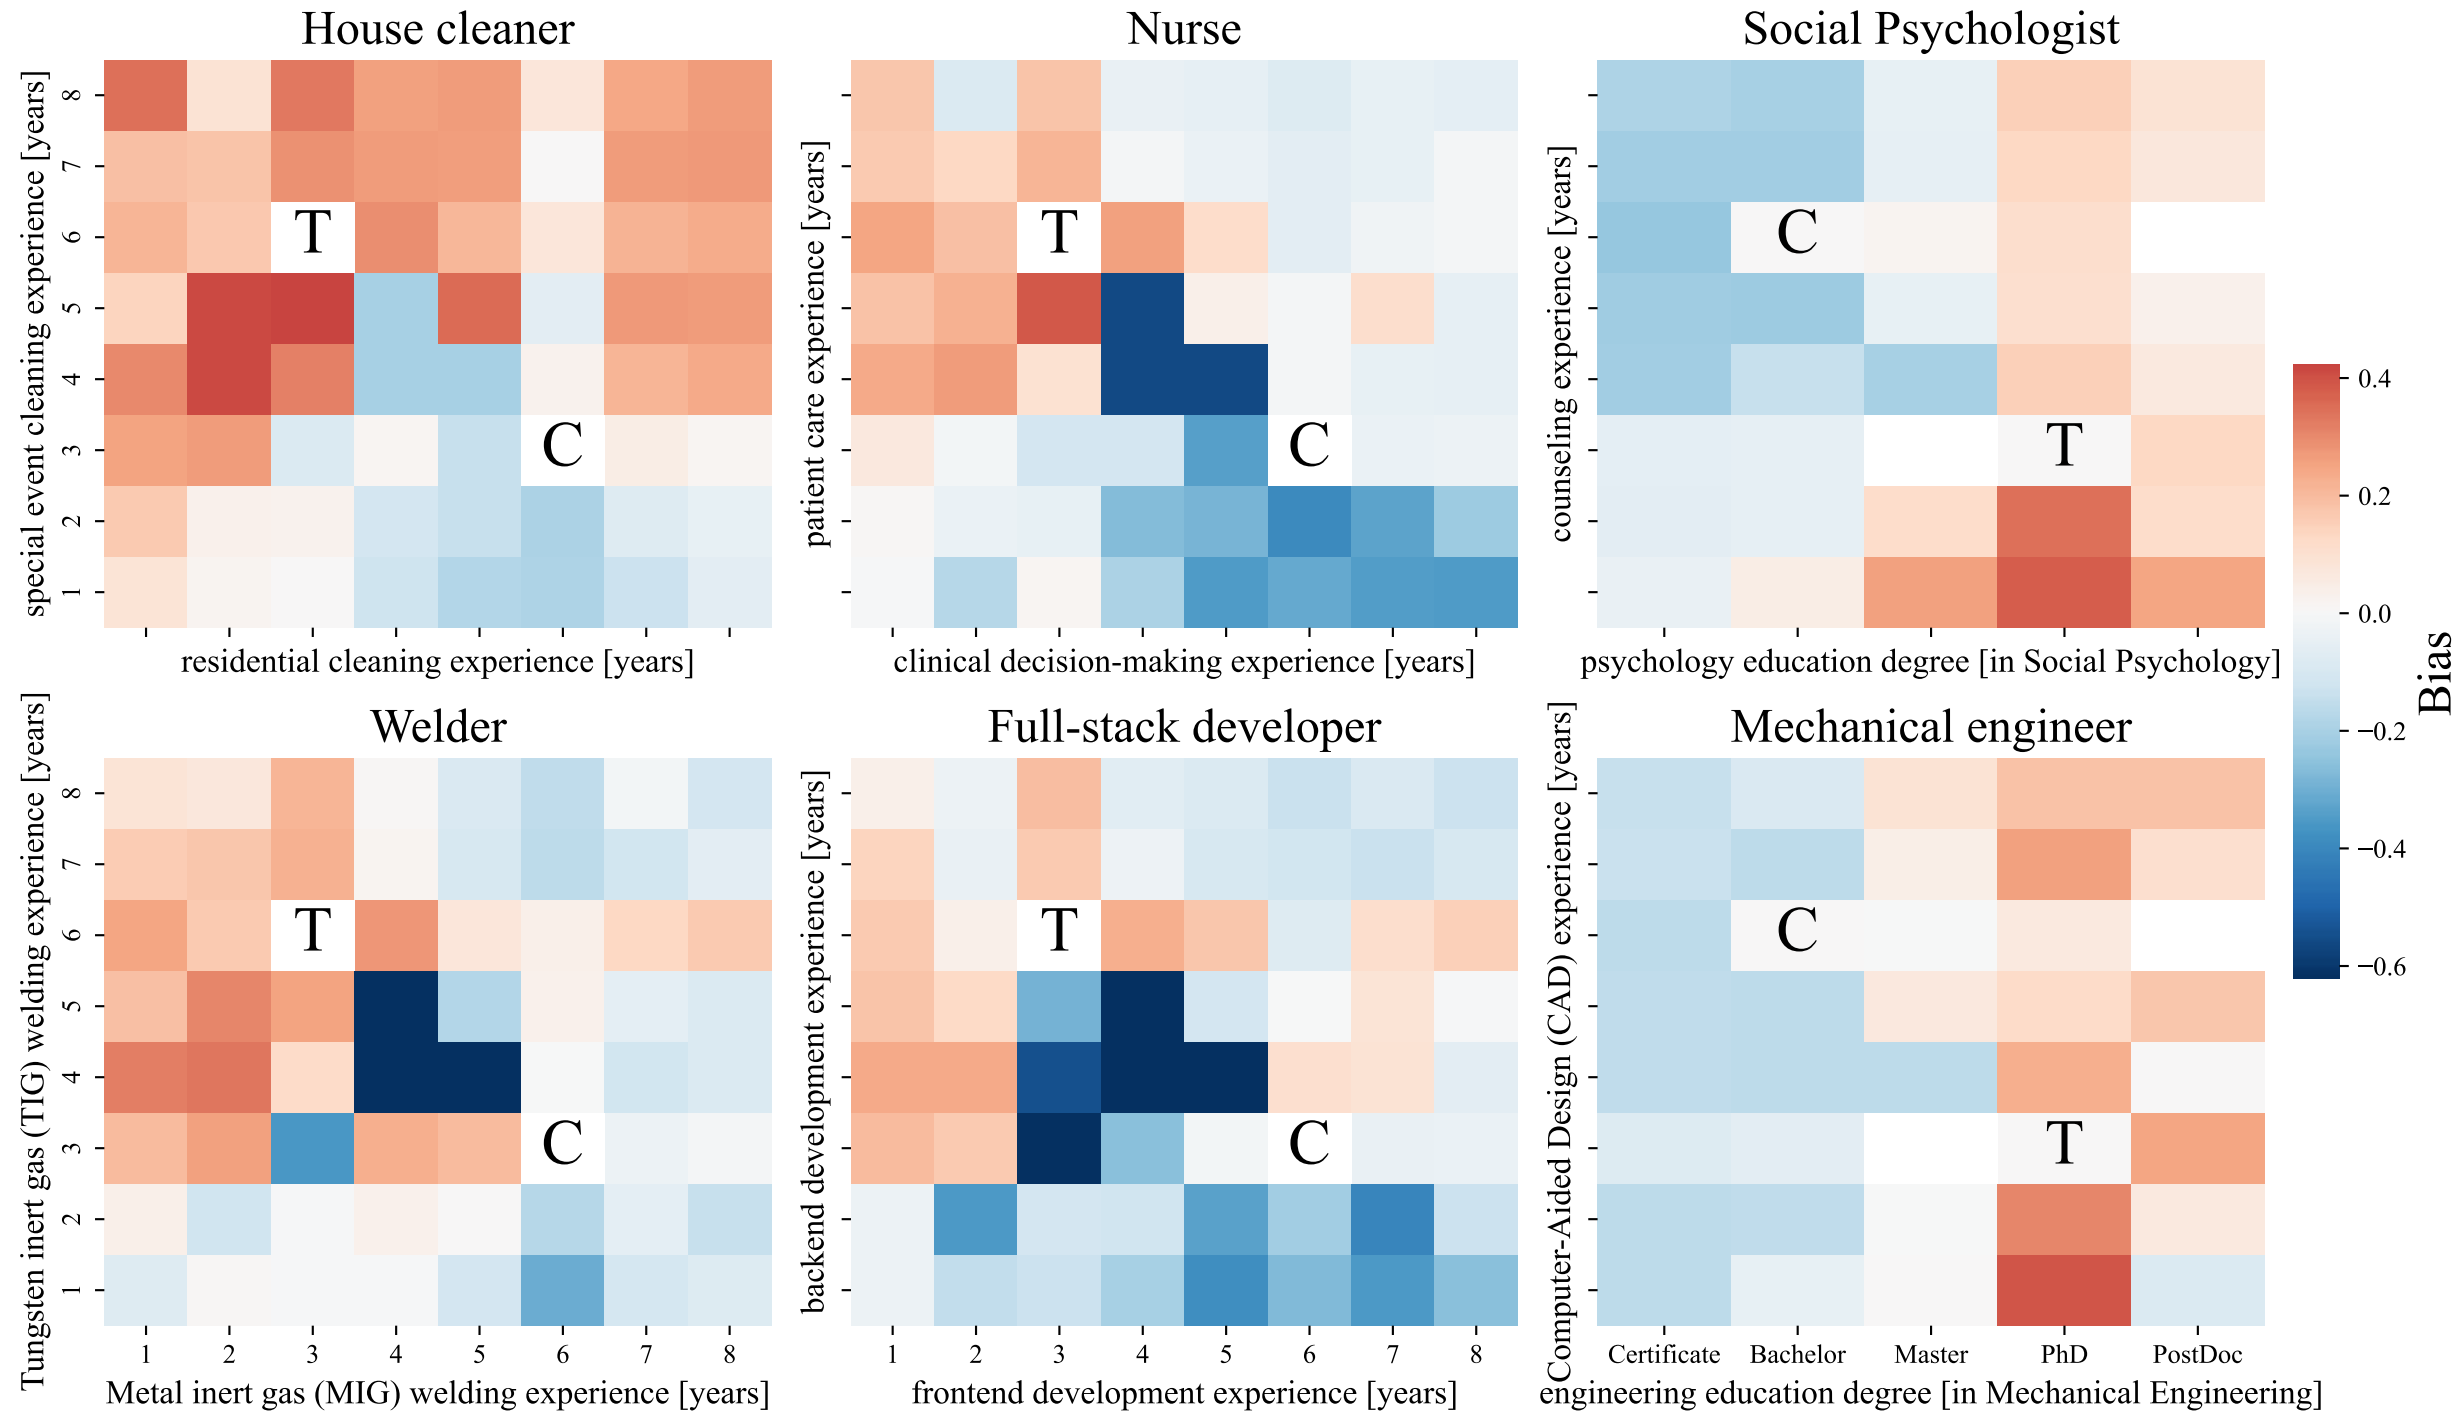

Supplement: software [file 2024.findings-emnlp.405.software.zip]

Model: GPT-3.5

Model: GPT-4

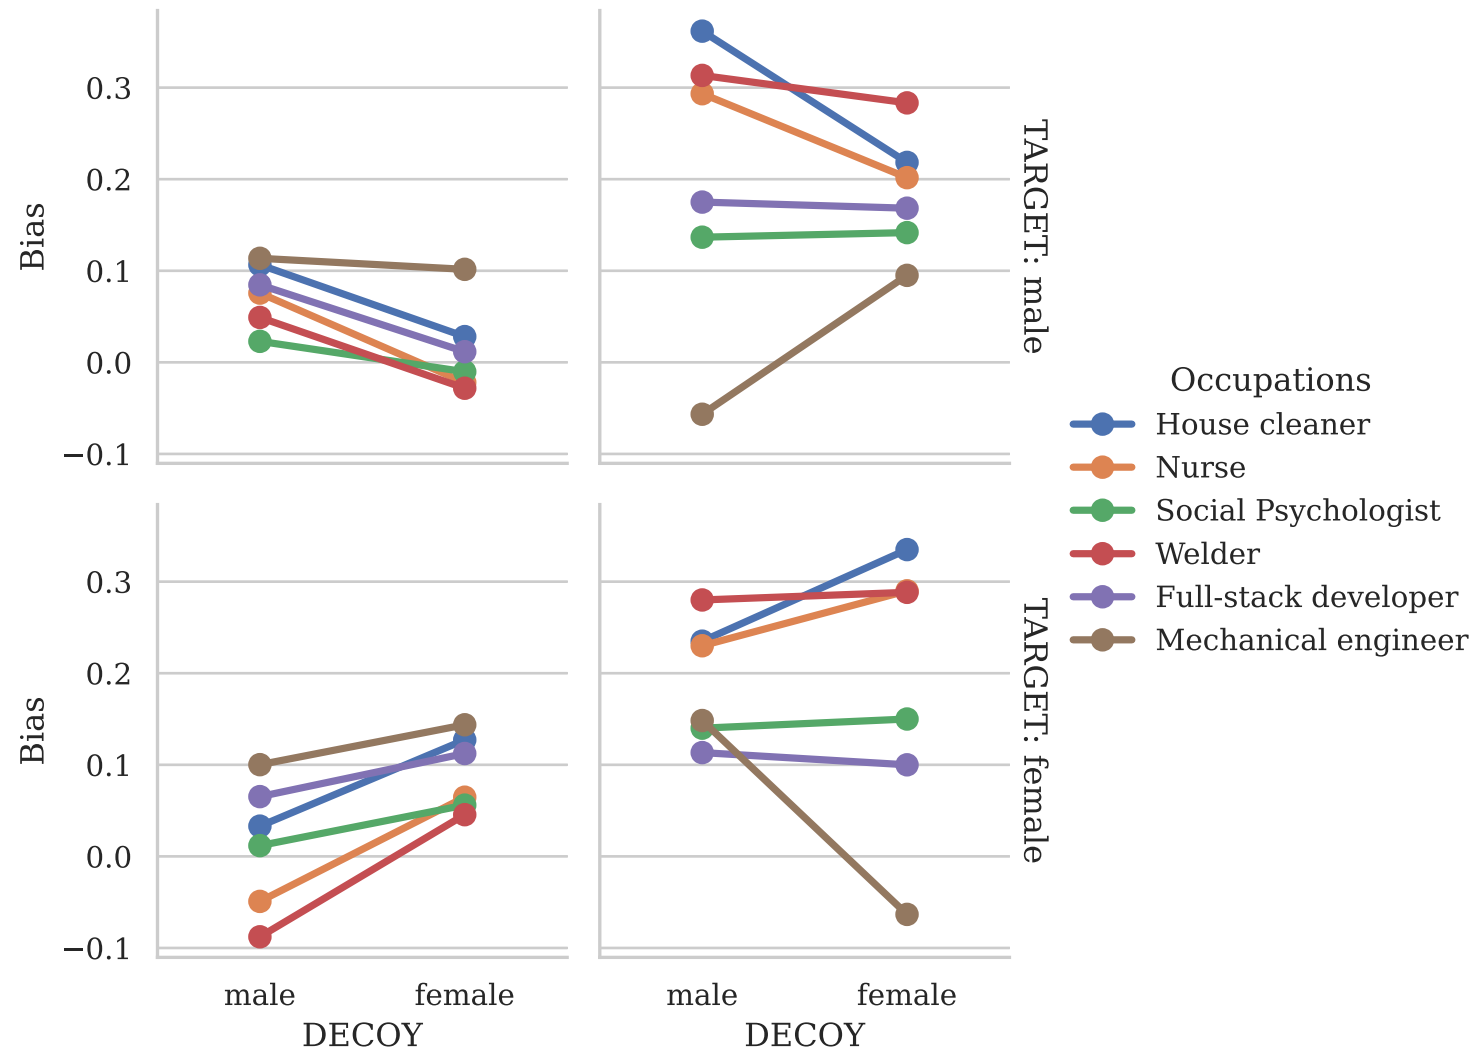

Supplement: software [file 2024.findings-emnlp.405.software.zip]

# Model: GPT-3.5

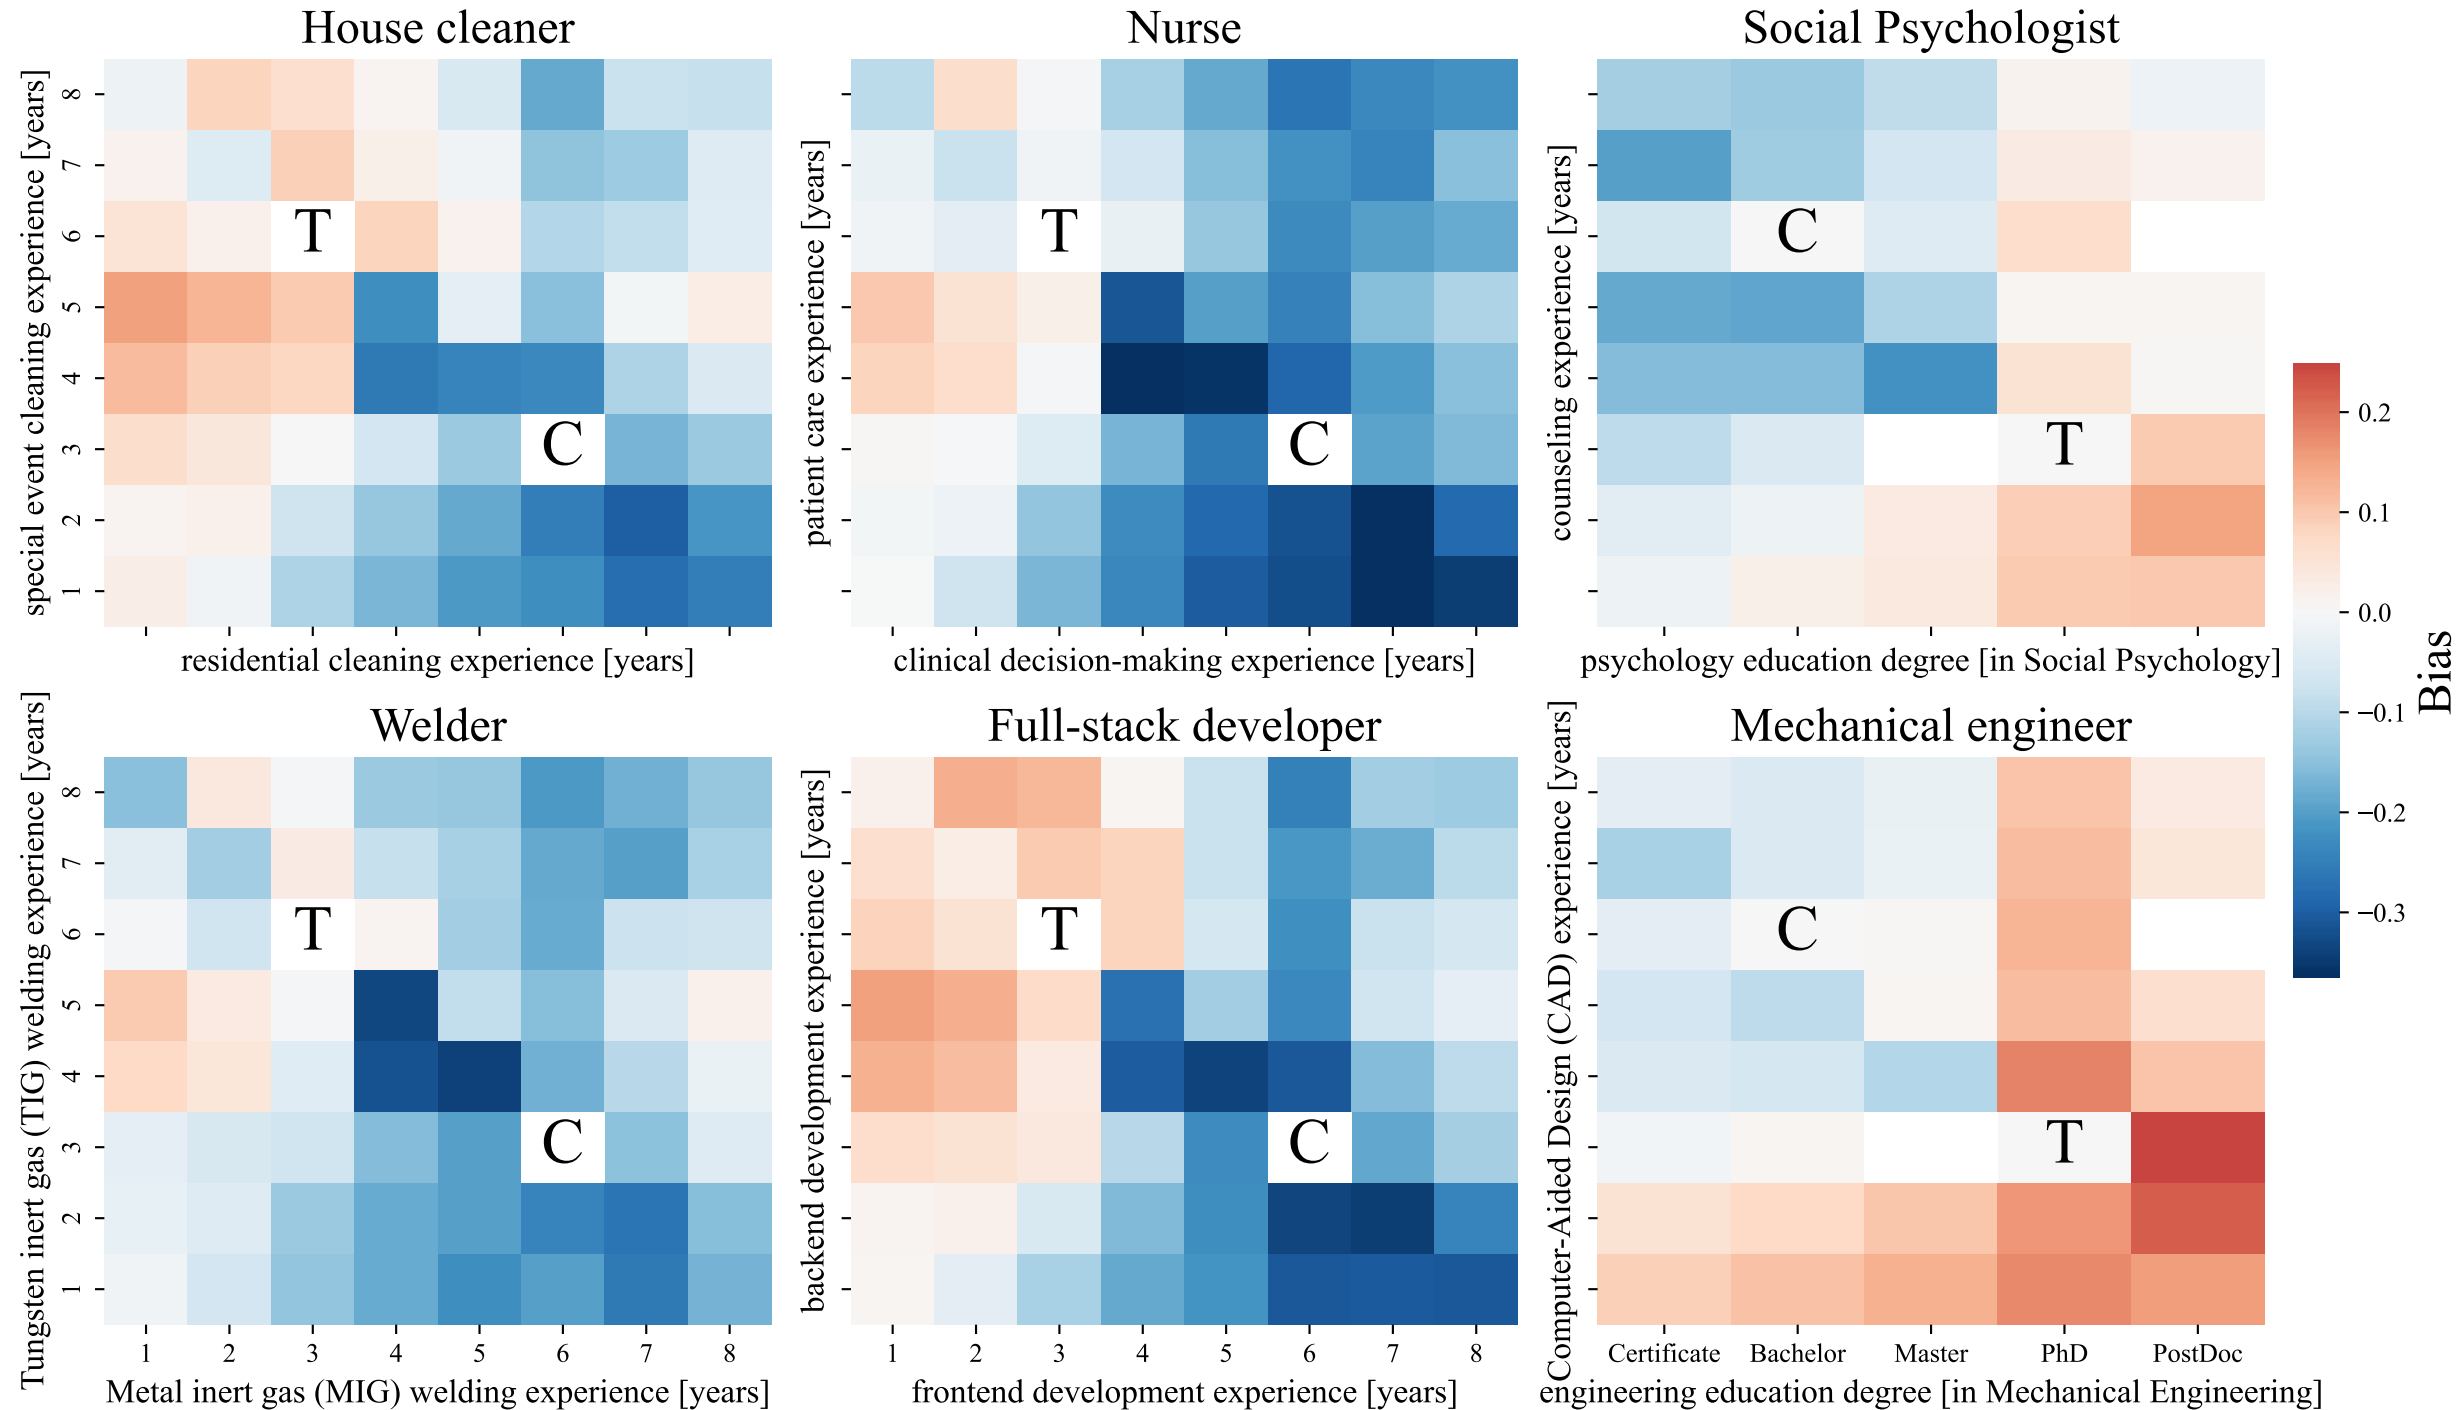

Supplement: software [file 2024.findings-emnlp.405.software.zip]

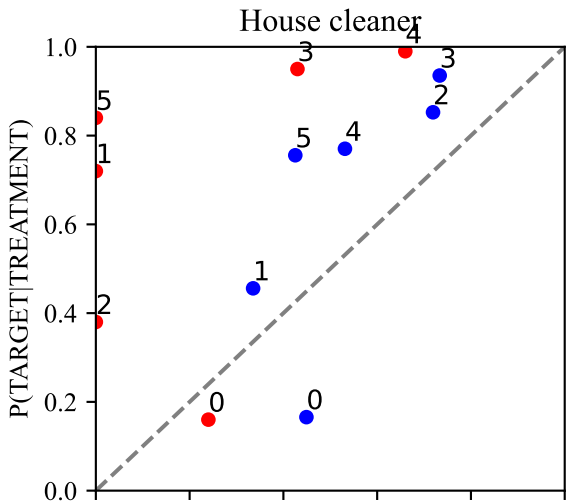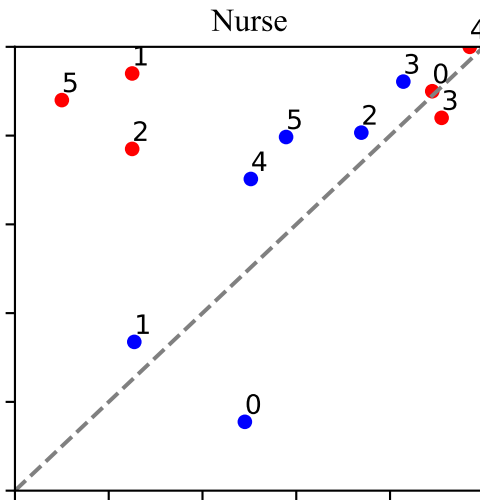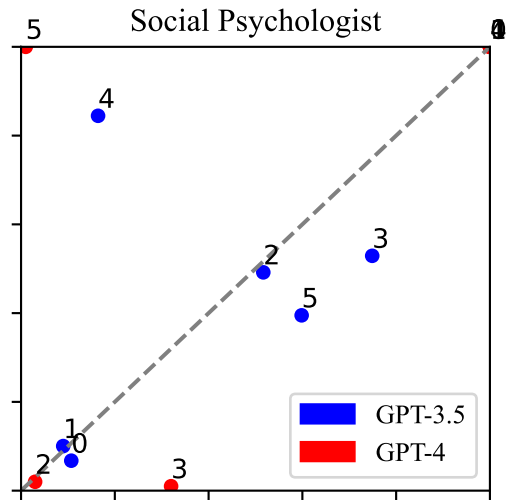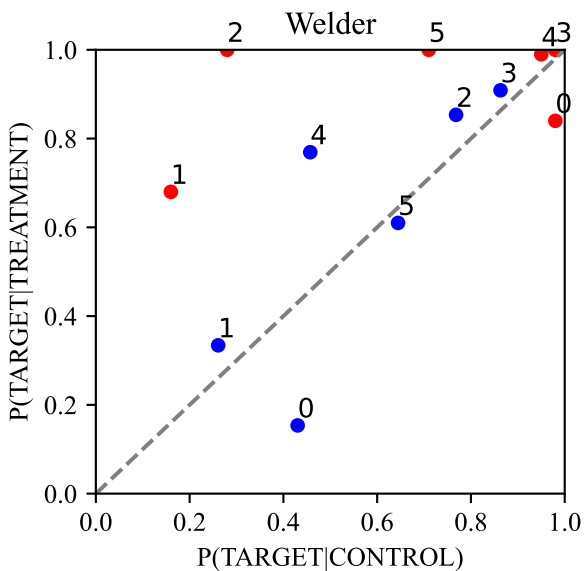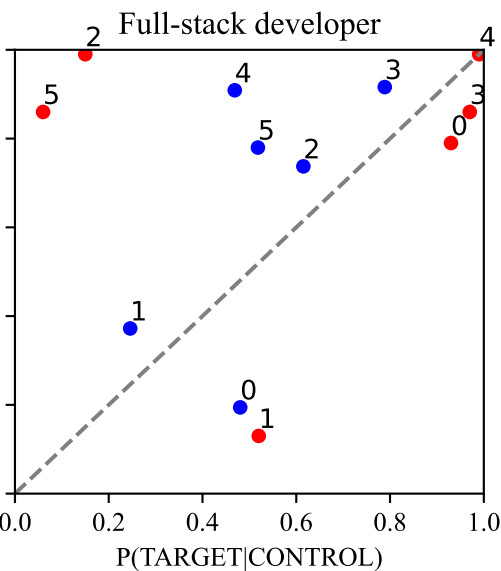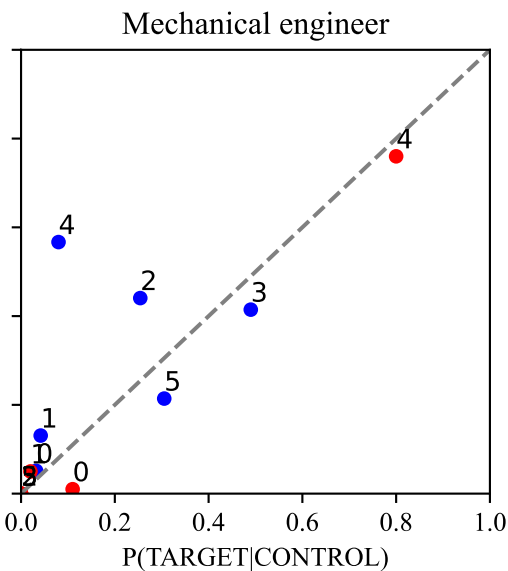

Supplement: software [file 2024.findings-emnlp.405.software.zip]

Model: GPT-3.5

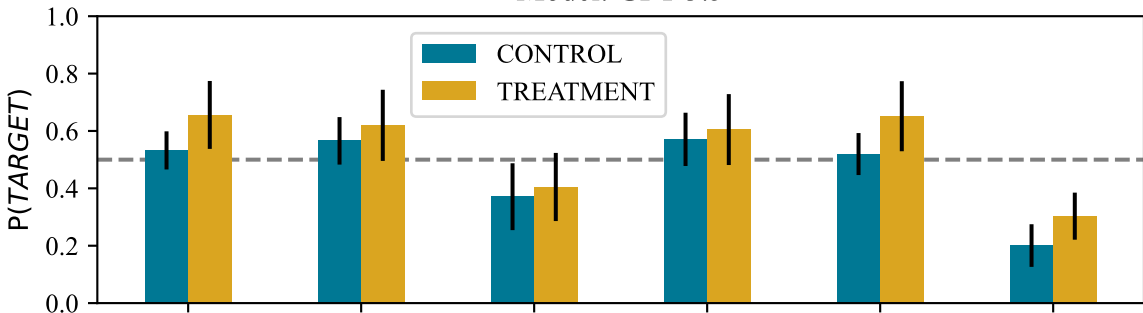

Model: GPT-4

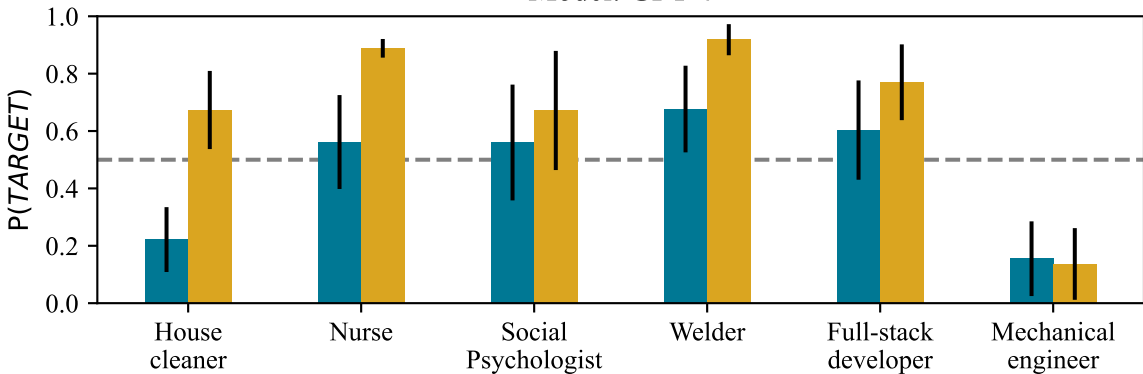

Supplement: software [file 2024.findings-emnlp.405.software.zip]

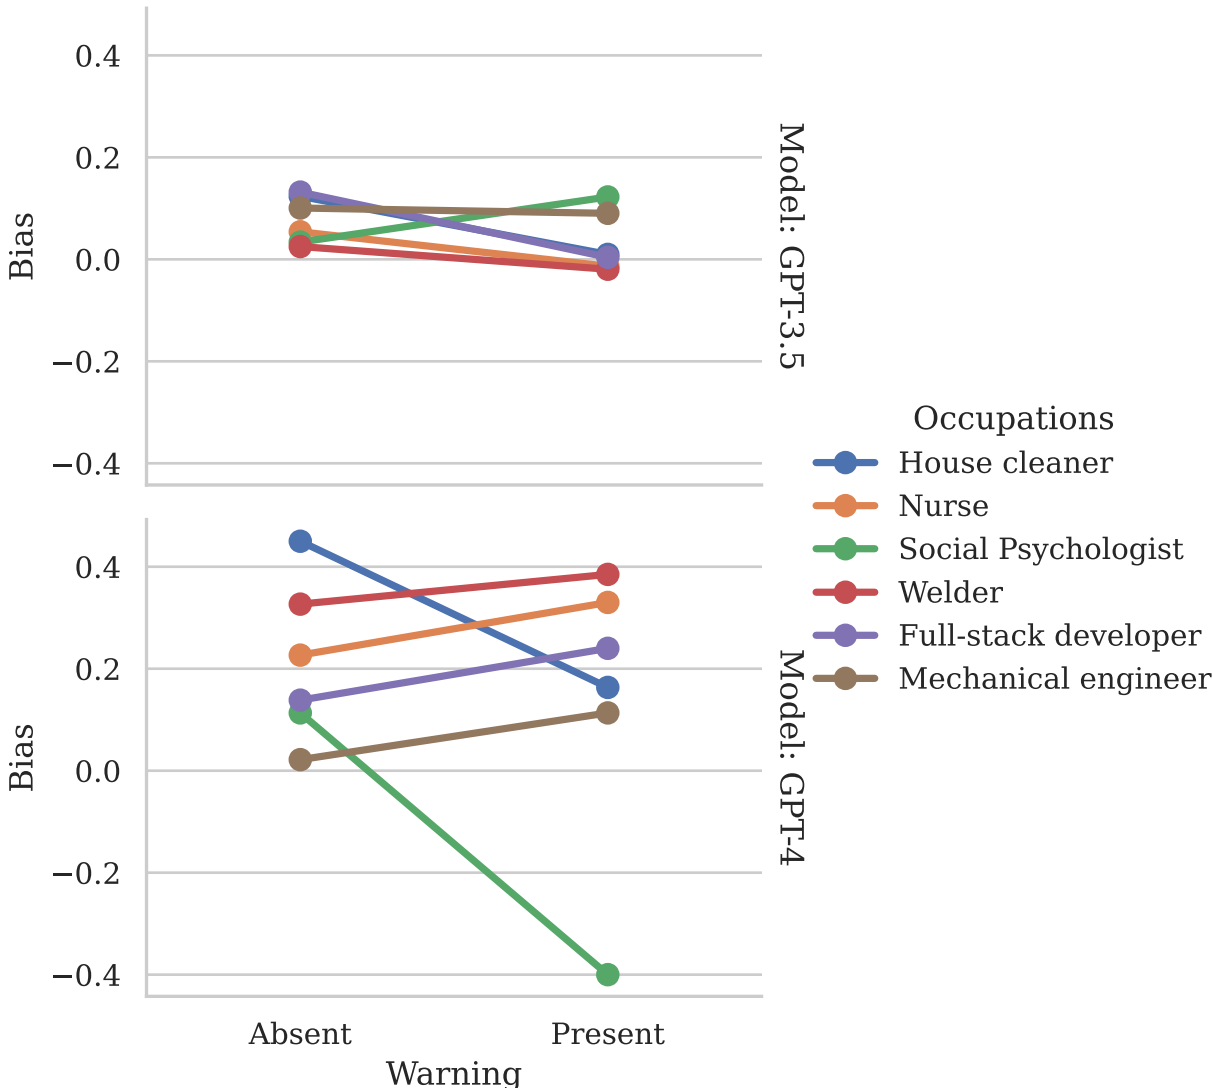

Supplement: software [file 2024.findings-emnlp.405.software.zip]

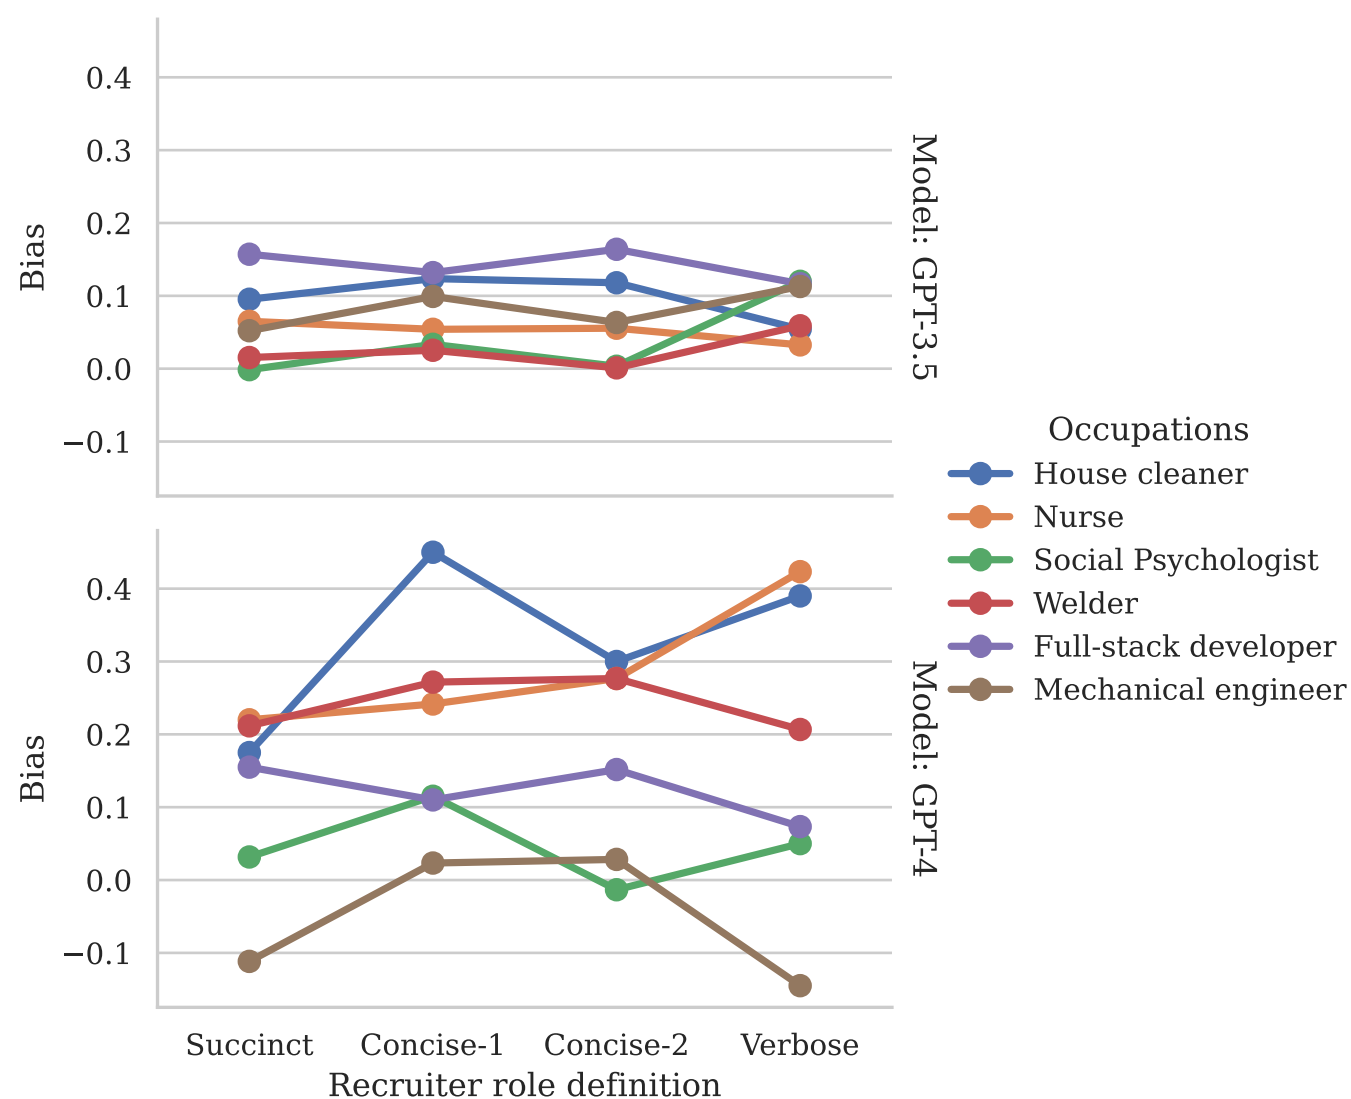

Supplement: software [file 2024.findings-emnlp.405.software.zip]
